# Supplementary material
Source: HighWire-hosted journal article supplement (https://www.jneurosci.org/highwire/filestream/599310/field_highwire_adjunct_files/4/Supplemental_Table_1.pdf)
Supplement: Supplemental_Table_1.pdf [file Supplemental_Table_1.pdf]

**Supplemental Table 1. Cortical surface regions of interest (ROIs) defined by a prior atlas-based template in standard stereotaxic space**

| Regions                      | Abbreviation | Regions                        | Abbreviation |
|------------------------------|--------------|--------------------------------|--------------|
| Superior frontal gyrus       | SFG          | Inferior temporal gyrus        | ITG          |
| Middle frontal gyrus         | MFG          | Uncus                          | UNC          |
| Inferior frontal gyrus       | IFG          | Medial occipitotemporal gyrus  | MOTG         |
| Medial frontal gyrus         | MdFG         | Lateral occipitotemporal gyrus | LOTG         |
| Precentral gyrus             | PrCG         | Parahippocampal gyrus          | PHG          |
| Lateral fronto-orbital gyrus | LOFG         | Occipital pole                 | OP           |
| Medial front-orbital gyrus   | MOFG         | Superior occipital gyrus       | SOG          |
| Superior parietal lobule     | SPL          | Middle occipital gyrus         | MOG          |
| Supramarginal gyrus          | SMG          | Inferior occipital gyrus       | IOG          |
| Angular gyrus                | ANG          | Cuneus                         | CUN          |
| Precuneus                    | PCU          | Lingual gyrus                  | LG           |
| Postcentral gyrus            | PoCG         | Cingulate region               | CING         |
| Superior temporal gyrus      | STG          | Insula                         | INS          |
| Middle temporal gyrus        | MTG          |                                |              |
